# Supplementary material for: A Mixed-Methods Process Evaluation: Integrating Depression Treatment Into HIV Care in Malawi
Source: PubMed Central journal article supplement (PMC8514021; doi:10.9745/ghsp-d-20-00607), 2021-09-30
Supplement: 20-00607-Stockton-Supplement.pdf [file 20-00607-Stockton-Supplement.pdf]

# POSTER- Depression Treatment with Antidepressants

## Choosing a Depression Treatment Plan

| PHQ-9 Total Score | Interpretation                | Depression Treatment Plan |
|-------------------|-------------------------------|---------------------------|
| 0-4               | No depression                 | None                      |
| 5-9               | Mild depression               | Friendship Bench          |
| 10-27             | Moderate to severe depression | Start antidepressant      |

## Starting an Antidepressant

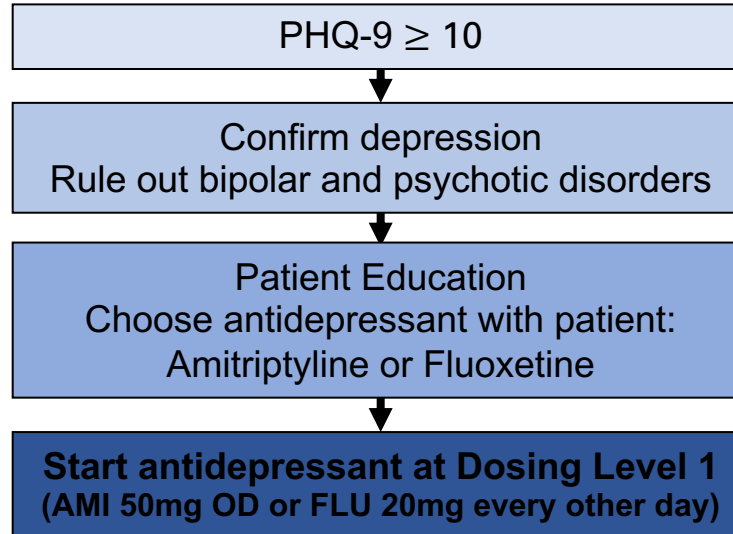

## Antidepressant Dosing Levels

|                                                                                  | Amitriptyline             | Fluoxetine             |
|----------------------------------------------------------------------------------|---------------------------|------------------------|
| <b>Dosing Level 1</b><br>Initial Dose                                            | 50mg once daily at night  | 20mg on alternate days |
| <b>Dosing Level 2</b>                                                            | 75mg once daily at night  | 20mg once daily        |
| <b>Dosing Level 3</b>                                                            | 100mg once daily at night | 40 mg once daily       |
| If patient is still depressed at Dosing Level 3, contact consulting psychiatrist |                           |                        |

## Follow-up: Months 1 and 2

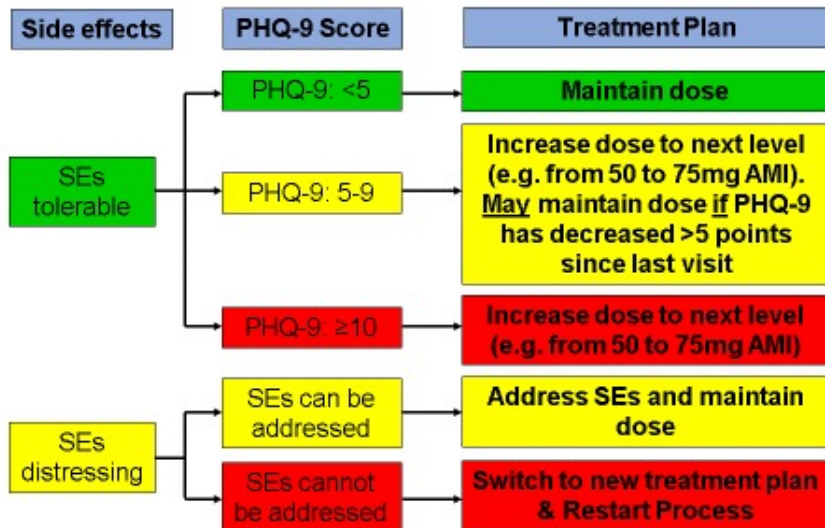

## Follow-up: Month 3

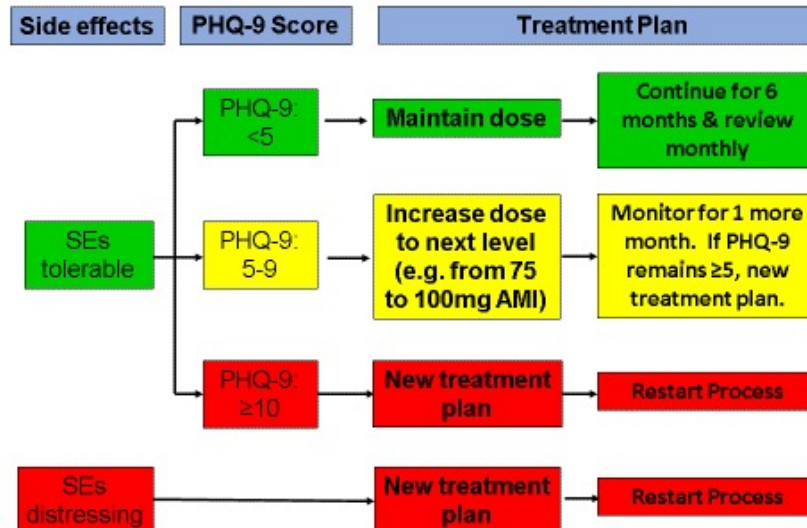

## Alternate Treatment Plans

|                                                              |                                                                                                                                                                                                              |
|--------------------------------------------------------------|--------------------------------------------------------------------------------------------------------------------------------------------------------------------------------------------------------------|
| If side effects cannot be addressed:                         | Consider: <ul style="list-style-type: none"> <li>• <b>Switching</b> to different antidepressant</li> <li>• <b>Switching</b> to Friendship Bench</li> <li>• <b>Contact</b> consulting psychiatrist</li> </ul> |
| If side effects are tolerable but patient remains depressed: | Consider: <ul style="list-style-type: none"> <li>• <b>Adding</b> Friendship Bench</li> <li>• <b>Switching</b> to different antidepressant</li> <li>• <b>Contact</b> consulting psychiatrist</li> </ul>       |
